# Supplementary material for: Age and Comorbidities as Risk Factors for Severe COVID-19 in Mexico, before, during and after Massive Vaccination
Source: MDPI journal article supplement (doi:10.3390/vaccines11111676), 2023-11-02

**Table S1.** Published studies included in the review section. All contain data from before anti-SARS-CoV-2 vaccination in Mexico.

| First Author<br>(reference<br>number) | Data from                   | Start and<br>end of<br>study<br>period<br>dd-mm-yy | N Total<br>patients | N of<br>SARS-<br>CoV-2<br>Negative | N of<br>confirmed as<br>COVID-19 by<br>RT-PCR | COVID-19 Cases     |                                      |                        |         |       |                      |
|---------------------------------------|-----------------------------|----------------------------------------------------|---------------------|------------------------------------|-----------------------------------------------|--------------------|--------------------------------------|------------------------|---------|-------|----------------------|
|                                       |                             |                                                    |                     |                                    |                                               | % male<br>% female | Ages included<br>(average or median) | %<br>Hospi-<br>talized | %ICU    | %Died | %with<br>comorbidity |
| [8]                                   | 475 USMER                   | 27-02-20<br>30-04-20                               | 23,593              | 18,443                             | 3,844                                         | 58.0<br>42.0       | All (45.4±15.8)                      | 19.0                   | 12.7    | 8.8   | 56.0                 |
| [26]                                  | Open data-<br>DGE SS        | 27-02-20<br>30-04-20                               | 87,372              | 52,628                             | 19,224                                        | 58.2<br>41.8       | 0-104 (46)                           | 39.4                   | NA      | 9.7   | ND                   |
| [13]                                  | Open data-<br>DGE SS        | 27-02-20<br>23 04 20                               | 10,544              | NA                                 | 10,544                                        | 57.8<br>42.2       | All (46.5±15.2)                      | 37.9                   | 4.7     | 9.2   | 44.3                 |
| [27]                                  | Open data-<br>DGE SS        | 28-02-20<br>27-04-20                               | 71,103              | 55,604                             | 15,529                                        | 57.0<br>43.0       | All (S 40,<br>NS 60)                 | NA                     | NA      | 16.1  | 17.6                 |
| [30]                                  | IMSS                        | 28-02-20<br>28-03-20                               | 740                 | NA                                 | 740                                           | 57.3<br>42.7       | >15 (43.7±14.9)                      | 27.9                   | NA      | NA    | ND                   |
| [14]                                  | Open data-<br>DGE SS        | 01-01-20<br>25-04-20                               | 13,842              | NA                                 | 13,842                                        | 57.7<br>42.3       | All (46.6±15)                        | 38.8                   | 2.4     | 9.4   | 45.3                 |
| [15]                                  | Open data-<br>DGE SS        | 24-02-20<br>26-04-20                               | 71,103              | 46,960                             | 15,529                                        | 57.8<br>42.2       | All (46.6)                           | 38.9                   | 1.6-4.4 | 9.2   | 45.8                 |
| [25]                                  | Open data-<br>DGE SS        | 21-02-20<br>28-04-20                               | 16,752              | NA                                 | 16,752                                        | 58.0<br>42.0       | All (46.5±15.5)                      | 39.2                   | 4.3     | 10.3  | 45.3                 |
| [28]                                  | Open data-<br>DGE SS        | 28 02 20<br>15-05-20                               | 32,583              | 20,279                             | 12,304                                        | 58.7<br>41.3       | All (45±11)                          | 45.0                   | 4.2     | 12.2  | ND                   |
| [20]                                  | Open data-<br>DGE SS        | 27-02-20<br>18-05-20                               | 51,053              | NA                                 | 51,053                                        | 57.6<br>42.4       | All (46.6±15.8)                      | NA                     | NA      | 10.3  | 45.8                 |
| [17]                                  | Open data-<br>DGE SS        | 27-02-20<br>18-05-20                               | 177,133             | 98,567                             | 51,633                                        | 57.7<br>42.3       | All (46.6)                           | 38.4                   | 3.7     | 10.3  | ND                   |
| [10]                                  | 12 third level<br>hospitals | 30-04-20<br>20-05-20                               | 400                 | NA                                 | 400                                           | 70.0<br>30.0       | Adults 20+ (NR)                      | 100                    | NA      | 50.0  | ND                   |
| [11]                                  | INCMNSZ                     | 16-03-20<br>21-05-20                               | 329                 | NA                                 | 329                                           | 64.0<br>36.0       | Adults 18+ (49±11)                   | 100                    | 48.3    | NA    | 70.0                 |
| [22]                                  | Open data-<br>DGE SS        | 27-02-20<br>23-05-20                               | 11,405              | 9,962                              | 1,443                                         | 48.0<br>52.0       | Children <18 (12)                    | ND                     | 3.3     | 1.9   | 44.4                 |
| [16]                                  | Open data-<br>DGE SS        | 27-02-20<br>27-06-20                               | 211,003             | NA                                 | 211,003                                       | 54.7<br>45.3       | All (45.7±16.3)                      | 31.0                   | 2.6     | 12.3  | 47.4                 |

|      |                                                      |                      |         |         |         |              |                                             |      |         |      |                  |
|------|------------------------------------------------------|----------------------|---------|---------|---------|--------------|---------------------------------------------|------|---------|------|------------------|
| [18] | Open data-<br>DGE SS                                 | 13-01-20<br>17-07-20 | 331,298 | NA      | 331,298 | 54.0<br>46.0 | All (44±11)                                 | 28.8 | 8.2     | 11.5 | ND               |
| [12] | Open data-<br>DGE SS                                 | 01-06-20<br>23-07-20 | 492,160 | 308,381 | 183,779 | 54.0<br>46.0 | All (46.3±15.9)                             | 26.5 | 2.4-3.3 | 7.9  | ND               |
| [19] | IMSS                                                 | 04-03-20<br>15-08-20 | 66,123  | NA      | 66,123  | 60.6<br>39.4 | Adults 20+ (53±14.5)                        | 100  | NA      | 48.3 | DM 33<br>HT 40.4 |
| [21] | Open data-<br>DGE SS                                 | 13-01-20<br>02-11-20 | 638,782 | NA      | 638,782 | 51.4<br>48.6 | All (44.4±16.7)                             | 25.6 | 5.6     | 11.0 | 43.0             |
| [23] | 3 hospitals in<br>Mexico City:<br>HFMS, HGM,<br>HCMM | 01-04-20<br>30-05-20 | 377     | NA      | 377     | 73.1<br>26.9 | Adults_18+<br>(S 41,5±22.7<br>NS 46,5±25,7) | 100  | NA      | 20.9 | 56.0             |
| [29] | Open data-<br>DGE SS                                 | 01-03-20<br>01 02 21 | 608     | NA      | 608     | 65.5<br>34.5 | Adults 18+<br>(S 51± 10<br>NS 62± 10,2)     | 100  | 23.0    | 43.4 | 100              |
| [31] | IMSS,                                                | 25-03-20<br>07-09-20 | 773     | NA      | 773     | 62.7<br>37.3 | Adults 18+<br>(OB 50±12)                    | 100  | 20-26   | 35.8 | 82.0             |
| [24] | HGM                                                  | 30-11-20<br>09-07-21 | 378     | NA      | 378     | 36.4<br>63.6 | Adults 18+<br>(S 51,4±13,2<br>NS 58,8±13,7) | 100  | 37.8    | 32.5 | ND               |

USMER=Unidades monitoras de enfermedad respiratoria (units that monitor respiratory disease); DGE SS= Dirección general de epidemiología (General Directory of Epidemiology) Secretaría de Salud (Health secretariat); IMSS= Instituto Mexicano del Seguro Social; INCMNSZ= Instituto Nacional de Ciencias Médicas y Nutrición Salvador Zubirán, HFMS= Hospital Fundación Médica Sur; HGM=Hospital General de México; HCMM=Hospital Central Militar; S= survivors; NS= non survivors; OB= mean age in obese individuals; NA= not analyzed; ND= no data.

**Table S2.** Symptomatic adult COVID-19 cases and deaths analyzed per wave, age and comorbidity in Mexico.

| Age (years)    | Comor-bidity | Wave 1<br>(Feb 16 2020-<br>Sept 19 2020) |        | Wave 2<br>(Sept 20 2020-<br>May 15 2021) |         | Wave 3<br>(May 16 2021-<br>Nov 20 2021) |        | Wave 4<br>(Nov 21 2021-<br>Abr 30 2022) |        | Wave 5<br>(May 1 2022-<br>Oct 15 2022) |        | Wave 6<br>(Oct 16 2022-<br>May 9 2023) |        | Total<br>All waves<br>(feb 2020-may 2023) |         |
|----------------|--------------|------------------------------------------|--------|------------------------------------------|---------|-----------------------------------------|--------|-----------------------------------------|--------|----------------------------------------|--------|----------------------------------------|--------|-------------------------------------------|---------|
|                |              | cases                                    | deaths | cases                                    | deaths  | cases                                   | deaths | cases                                   | deaths | cases                                  | deaths | cases                                  | deaths | cases                                     | deaths  |
| 20-39          | no           | 202,831                                  | 1,992  | 492,791                                  | 2,575   | 596,909                                 | 3,272  | 750,143                                 | 445    | 507,199                                | 134    | 160,309                                | 68     | 2,710,180                                 | 8,486   |
|                | yes          | 85,609                                   | 3,339  | 155,430                                  | 3,759   | 131,459                                 | 3,707  | 133,034                                 | 660    | 84,038                                 | 126    | 35,380                                 | 78     | 624,950                                   | 11,669  |
|                | no+yes       | 288,440                                  | 5,331  | 648,221                                  | 6,334   | 728,368                                 | 6,979  | 883,177                                 | 1,105  | 591,237                                | 260    | 195,689                                | 146    | 3,335,132                                 | 20,155  |
|                | total        | 289,645                                  | 5,385  | 650,068                                  | 6,369   | 735,028                                 | 7,026  | 889,632                                 | 1,112  | 596,758                                | 261    | 196,573                                | 147    | 3,357,704                                 | 20,300  |
| 40-59          | no           | 153,393                                  | 10,055 | 346,855                                  | 14,328  | 272,568                                 | 7,291  | 447,486                                 | 1,505  | 321,981                                | 229    | 109,320                                | 129    | 1,651,603                                 | 33,537  |
|                | yes          | 149,696                                  | 22,945 | 248,235                                  | 26,807  | 145,528                                 | 13,379 | 179,136                                 | 3,637  | 120,937                                | 455    | 55,722                                 | 287    | 899,254                                   | 67,510  |
|                | no+yes       | 303,089                                  | 33,000 | 595,090                                  | 41,135  | 418,096                                 | 20,670 | 626,622                                 | 5,142  | 442,918                                | 684    | 165,042                                | 416    | 2,550,857                                 | 101,047 |
|                | total        | 304,589                                  | 33,278 | 597,004                                  | 41,360  | 422,116                                 | 20,782 | 631,490                                 | 5,169  | 447,343                                | 686    | 165,807                                | 416    | 2,568,349                                 | 101,691 |
| 60-79          | no           | 41,214                                   | 11,802 | 92,241                                   | 19,583  | 59,170                                  | 7,449  | 73,854                                  | 3,052  | 74,519                                 | 491    | 30,486                                 | 337    | 371,484                                   | 42,714  |
|                | yes          | 92,990                                   | 36,069 | 160,096                                  | 51,869  | 79,975                                  | 19,792 | 70,952                                  | 8,591  | 58,211                                 | 1,413  | 31,965                                 | 1,042  | 494,189                                   | 118,776 |
|                | no+yes       | 134,204                                  | 47,871 | 252,337                                  | 71,452  | 139,145                                 | 27,241 | 144,806                                 | 11,643 | 132,730                                | 1,904  | 62,451                                 | 1,379  | 865,673                                   | 161,490 |
|                | total        | 134,956                                  | 48,190 | 253,336                                  | 71,795  | 140,450                                 | 27,371 | 146,037                                 | 11,698 | 134,022                                | 1,912  | 62,723                                 | 1,385  | 871,524                                   | 162,351 |
| 80+            | no           | 5,732                                    | 2,694  | 12,397                                   | 5,113   | 7,927                                   | 2,345  | 9,247                                   | 1,949  | 7,927                                  | 468    | 4,218                                  | 322    | 47,448                                    | 12,891  |
|                | yes          | 15,148                                   | 8,273  | 27,432                                   | 13,500  | 14,136                                  | 5,722  | 14,534                                  | 4,620  | 9,453                                  | 1,039  | 6,649                                  | 783    | 87,352                                    | 33,937  |
|                | no+yes       | 20,880                                   | 10,967 | 39,829                                   | 18,613  | 22,063                                  | 8,067  | 23,781                                  | 6,569  | 17,380                                 | 1,507  | 10,867                                 | 1,105  | 134,800                                   | 46,828  |
|                | total        | 21,040                                   | 11,048 | 40,216                                   | 18,724  | 22,282                                  | 8,100  | 24,009                                  | 6,601  | 17,563                                 | 1,513  | 10,931                                 | 1,108  | 136,041                                   | 47,094  |
| All adults 20+ | no           | 403,170                                  | 26,543 | 944,284                                  | 41,599  | 936,574                                 | 20,357 | 1,280,730                               | 6,951  | 911,626                                | 1,322  | 304,333                                | 856    | 4,780,717                                 | 97,628  |
|                | yes          | 343,443                                  | 70,626 | 591,193                                  | 95,935  | 371,098                                 | 42,600 | 397,656                                 | 17,508 | 272,639                                | 3,033  | 129,716                                | 2,190  | 2,105,745                                 | 231,892 |
|                | no+yes       | 746,613                                  | 97,169 | 1,535,477                                | 137,534 | 1,307,672                               | 62,957 | 1,678,386                               | 24,459 | 1,184,265                              | 4,355  | 434,049                                | 3,046  | 6,886,462                                 | 329,520 |
|                | total        | 750,230                                  | 97,901 | 1,540,624                                | 138,248 | 1,319,876                               | 63,279 | 1,691,168                               | 24,580 | 1,195,686                              | 4,372  | 436,034                                | 3,056  | 6,933,618                                 | 331,436 |

Mortality was significantly higher in older age groups, with  $p < 0.0001$  for all CFR comparisons of 40-59, 60-79, 80+ vs 20-39, per wave and in total. Mortality was significantly higher in wave 1-2 (before vaccines), vs wave 5 and/or 6 in every age adult group and in total adults, with  $p < 0.0001$ .

**Table S3.** Risk factors associated with the development of pneumonia, the need for assisted mechanical ventilation or intensive care unit in COVID-19 from studies published before anti-SARS-CoV-2 vaccination (with data up to January 2021)

| Pneumonia   |                                  |                 | Assisted mechanical ventilation |                                                      |                         | Intensive Care Unit |                                                 |                              |
|-------------|----------------------------------|-----------------|---------------------------------|------------------------------------------------------|-------------------------|---------------------|-------------------------------------------------|------------------------------|
| Risk factor | OR (95% CI)                      | Reference       | Risk Factor                     | OR (95% CI)                                          | Reference               | Risk Factor         | OR ( 95% CI)                                    | Reference                    |
| DM+CKD      | 11 (4-30)                        | [14]            | Ob + CVD                        | 3.9 (1.1-14)                                         | [14,15]                 | Ob + DM             | 2.1 (1.3-3.4)<br>1.9 (1.2-3.1)                  | [14]<br>[15]                 |
| DM+COPD     | 3.6 (1.5-8.6)                    | [14]            | Ob + DM                         | 2.9 (1.8-4.5)<br>2.5 (1.6-3.9)                       | [14,15]                 | Ob + HT             | 2.2 (1.5-3.2)<br>2.1 (1.2-2.2)                  | [15]<br>[14]                 |
| DM + Ob     | 3.3 (2.5-4.2)<br>2.0 (1.8-2.1)   | [14,15]<br>[20] | HT+ CVD                         | 2.6 (1.2-5.6)                                        | [14]                    | ≥1 Comorbidity      | 1.9 (1.7-2.0)                                   | [20]                         |
| Ob + IS     | 2.8 (1.2-6.7)                    | [14,15]         | Ob + HT                         | 2.4 (1.6-3.6)                                        | [14,15]                 | Ob                  | 1.9 (1.5-2.5)<br>1.7 (1.4-1.9)<br>1.4 (1.2-1.6) | [15]<br>[14, 16, 20]<br>[17] |
| IS          | 2.8 (1.8-4.4)<br>1.7 (1.3-2.3)   | [15]<br>[14,20] | Ob                              | 1.9 (1.5-2.6)<br>1.7 (1.4-2.0)                       | [15]<br>[14,16]         | DM                  | 1.7 (1.6-1.8)<br>1.5 (1.1-2.0)<br>1.3 (1.1-1.6) | [16, 20]<br>[15]<br>[14,17]  |
| CKD         | 2.4 (1.9-3.1)<br>2.0 (1.78-2.26) | [14,20]<br>[20] | DM+HT                           | 1.8 (1.3-2.5)                                        | [14]                    | IS                  | 1.68 (1.4-1.9)                                  | [16, 20]                     |
| DM          | 2.4 (2.0-2.8)<br>2.2 (1.9-2.4)   | [15]<br>[14,20] | DM                              | 1.67 (1.58-1.78)<br>1.5 (1.1-2.0)<br>1.2 (1.25-1.30) | [16]<br>[14,15]<br>[17] | Male                | 1.4 (1.2-1.6)                                   | [17]                         |
| DM +HT      | 2.1 (1.7-2.5)                    | [14,20]         | HT                              | 1.4 (1.2-1.7)                                        | [14]                    | HTA                 | 1.3 (1.1-1.6)                                   | [14]                         |
| Ob + HT     | 1.9 (1.6-2.4)<br>1.57 (1.5-1.6)  | [14,15]<br>[20] | CKD                             | 1.3 (1.1-1.4)                                        | [16]                    | Age >65             | 1.3 (1.1-1.5)                                   | [17]                         |
| Ob          | 1.6 (1.4-1.7)<br>1.7 (1.5-1.9)   | [14,20]<br>[15] | IS                              | 1.3 (1.1-1.5)                                        | [16]                    |                     |                                                 |                              |
| COPD        | 1.6 (1.9-2.7)<br>1.3 (1.1-1.5)   | [14]<br>[20]    | Male                            | 1.3 (1.2-1.5)                                        | [17]                    |                     |                                                 |                              |
| HT          | 1.5 (1.3-1.7)                    | [14, 15, 20]    | Age >65                         | 1.3 (1.2-1.4)                                        | [17]                    |                     |                                                 |                              |
| CVD         | 1.4 (1.1-1.7)                    | [14,20]         |                                 |                                                      |                         |                     |                                                 |                              |

DM= diabetes mellitus; COPD= chronic obstructive pulmonary disease; Ob = obesity; IS= immunosuppression; CKD = Chronic kidney disease; HT = systemic hypertension; CVD= Cardiovascular disease. OR= Odds Ratio; More than one OR value may be together if all values were contained within the 95% CI (Confidence interval)

**Table S4. Crude numbers of COVID-19 deaths with each comorbidity (alone or in combination with other comorbidities) per wave, in the total Mexican population (all ages)**

| wave           | diabetes | COPD   | asthma | IS    | HT      | Other  | CVD    | obesity | CKD    | smoker | total COVID-19 deaths (100%) |
|----------------|----------|--------|--------|-------|---------|--------|--------|---------|--------|--------|------------------------------|
| <b>1 and 2</b> | 87,537   | 10,228 | 4,063  | 5,170 | 105,883 | 11,896 | 11,657 | 50,894  | 15,803 | 17,875 | 236,944                      |
| <b>3</b>       | 22,309   | 2,450  | 1,115  | 1,325 | 26,067  | 2,882  | 2,809  | 13,119  | 4,322  | 4,239  | 63,738                       |
| <b>4</b>       | 9,628    | 1,458  | 391    | 871   | 11,967  | 1,752  | 1,776  | 3,367   | 2,969  | 1,965  | 24,861                       |
| <b>5</b>       | 1,607    | 353    | 73     | 250   | 2,016   | 426    | 378    | 393     | 577    | 357    | 4,496                        |
| <b>6</b>       | 1,140    | 292    | 56     | 174   | 1,450   | 264    | 351    | 333     | 398    | 259    | 3,127                        |

**Table S5.** Mean age  $\pm$  standard error at COVID-19 death in adults with each of the comorbidity combinations.

|              | Wave 1<br>and 2                | Wave 3                         | Wave 4                         | Wave 5                         | Wave 6                         | Wave 5<br>and 6                | Difference of the<br>mean death age<br>in years;<br>after-before<br>vaccines <sup>a</sup> | p       |
|--------------|--------------------------------|--------------------------------|--------------------------------|--------------------------------|--------------------------------|--------------------------------|-------------------------------------------------------------------------------------------|---------|
| COPD only    | 72.0 $\pm$ 0.3                 | 72.9 $\pm$ 0.7                 | 77.3 $\pm$ 1.0                 | 80.4 $\pm$ 1.4                 | 80.5 $\pm$ 1.6                 | 80.4 $\pm$ 1.1                 | 8.4                                                                                       | 0.00107 |
| CVD only     | 69.3 $\pm$ 0.5                 | 69.0 $\pm$ 1.0                 | 74.3 $\pm$ 1.4                 | 79.5 $\pm$ 2.5                 | 78.5 $\pm$ 2.5                 | 79.0 $\pm$ 1.8                 | 9.7                                                                                       | <0.0001 |
| HT only      | 68.8 $\pm$ 0.1                 | 68.0 $\pm$ 0.2                 | 74.6 $\pm$ 0.3                 | 77.9 $\pm$ 0.7                 | 78.2 $\pm$ 0.8                 | 78.1 $\pm$ 0.5                 | 9.2                                                                                       | <0.0001 |
| DM-HT        | 67.0 $\pm$ 0.1                 | 66.1 $\pm$ 0.2                 | 70.9 $\pm$ 0.2                 | 74.4 $\pm$ 0.5                 | 74.3 $\pm$ 0.7                 | 74.4 $\pm$ 0.4                 | 7.4                                                                                       | <0.0001 |
| smoker only  | 62.7 $\pm$ 0.2                 | 60.3 $\pm$ 0.5                 | 70.4 $\pm$ 0.8                 | 68.5 $\pm$ 2.4                 | 67.1 $\pm$ 2.4                 | 67.9 $\pm$ 1.7                 | 5.1                                                                                       | 0.0004  |
| <b>NONE</b>  | <b>61.9<math>\pm</math>0.1</b> | <b>58.1<math>\pm</math>0.1</b> | <b>68.2<math>\pm</math>0.2</b> | <b>69.2<math>\pm</math>0.5</b> | <b>70.7<math>\pm</math>0.6</b> | <b>69.7<math>\pm</math>0.4</b> | <b>7.8</b>                                                                                | <0.0001 |
| DM only      | 62.3 $\pm$ 0.1                 | 60.4 $\pm$ 0.2                 | 67.2 $\pm$ 0.4                 | 69.9 $\pm$ 0.9                 | 70.6 $\pm$ 1.2                 | 70.2 $\pm$ 0.7                 | 7.8                                                                                       | <0.0001 |
| DM-HT-Ob     | 63.2 $\pm$ 0.1                 | 61.2 $\pm$ 0.3                 | 66.0 $\pm$ 0.5                 | 71.9 $\pm$ 1.7                 | 70.9 $\pm$ 2.0                 | 71.5 $\pm$ 1.3                 | 8.2                                                                                       | <0.0001 |
| HT-Ob        | 62.4 $\pm$ 0.1                 | 59.8 $\pm$ 0.3                 | 65.5 $\pm$ 0.6                 | 72.8 $\pm$ 2.1                 | 71.9 $\pm$ 2.1                 | 72.3 $\pm$ 1.5                 | 10.0                                                                                      | <0.0001 |
| DM-HT-CKD    | 62.4 $\pm$ 0.2                 | 61.8 $\pm$ 0.3                 | 63.9 $\pm$ 0.4                 | 68.2 $\pm$ 0.9                 | 67.0 $\pm$ 1.2                 | 67.7 $\pm$ 0.7                 | 5.4                                                                                       | <0.0001 |
| OTHER        | 62.8 $\pm$ 0.3                 | 59.2 $\pm$ 0.7                 | 63.6 $\pm$ 0.9                 | 62.3 $\pm$ 2.0                 | 69.0 $\pm$ 2.4                 | 64.8 $\pm$ 1.5                 | 2.0                                                                                       | 0.0964  |
| asthma only  | 57.2 $\pm$ 0.5                 | 54.1 $\pm$ 1.2                 | 61.9 $\pm$ 2.5                 | 67.1 $\pm$ 5.6                 | 61.9 $\pm$ 6.7                 | 64.8 $\pm$ 4.2                 | 7.6                                                                                       | 0.0182  |
| DM-Ob        | 58.9 $\pm$ 0.2                 | 55.7 $\pm$ 0.4                 | 62.2 $\pm$ 0.9                 | 65.1 $\pm$ 3.1                 | 65.0 $\pm$ 5.6                 | 65.1 $\pm$ 2.7                 | 6.2                                                                                       | 0.0052  |
| HT-CKD       | 58.0 $\pm$ 0.4                 | 56.2 $\pm$ 0.8                 | 60.4 $\pm$ 1.0                 | 65.6 $\pm$ 2.0                 | 58.7 $\pm$ 3.3                 | 63.3 $\pm$ 1.8                 | 5.3                                                                                       | 0.0031  |
| Obesity only | 54.6 $\pm$ 0.1                 | 48.9 $\pm$ 0.2                 | 59.1 $\pm$ 0.7                 | 61.1 $\pm$ 2.4                 | 61.1 $\pm$ 4.1                 | 61.1 $\pm$ 2.1                 | 6.5                                                                                       | <0.0001 |
| CKD only     | 55.3 $\pm$ 0.5                 | 52.8 $\pm$ 1.0                 | 58.0 $\pm$ 1.4                 | 58.8 $\pm$ 3.3                 | 66.5 $\pm$ 3.7                 | 62.2 $\pm$ 2.5                 | 6.9                                                                                       | 0.0028  |
| IS only      | 57.6 $\pm$ 0.6                 | 56.3 $\pm$ 1.2                 | 58.5 $\pm$ 1.6                 | 53.0 $\pm$ 2.4                 | 56.5 $\pm$ 2.6                 | 54.3 $\pm$ 1.8                 | -3.3                                                                                      | 0.0825  |

COPD= chronic obstructive pulmonary disease; CVD= Cardiovascular disease; HT = systemic hypertension; DM= diabetes mellitus; NONE= no comorbidity reported; Ob = obesity; IS= immunosuppression; CKD = Chronic kidney disease. <sup>a</sup> after-before vaccine introduction was calculated by finding the difference in mean age at death during wave 1 and 2 vs wave 5 and 6

**Figure S1.** The specific comorbidity combinations found in the adults that died from COVID-19 during the sanitary emergency, as reported in the complete national dataset. The bracket depicts the combinations that are portrayed in figure 5 and comprise 81.5% of adult deaths. Only 0.3% of COVID-19 deaths contain no info about comorbidities in the national dataset.

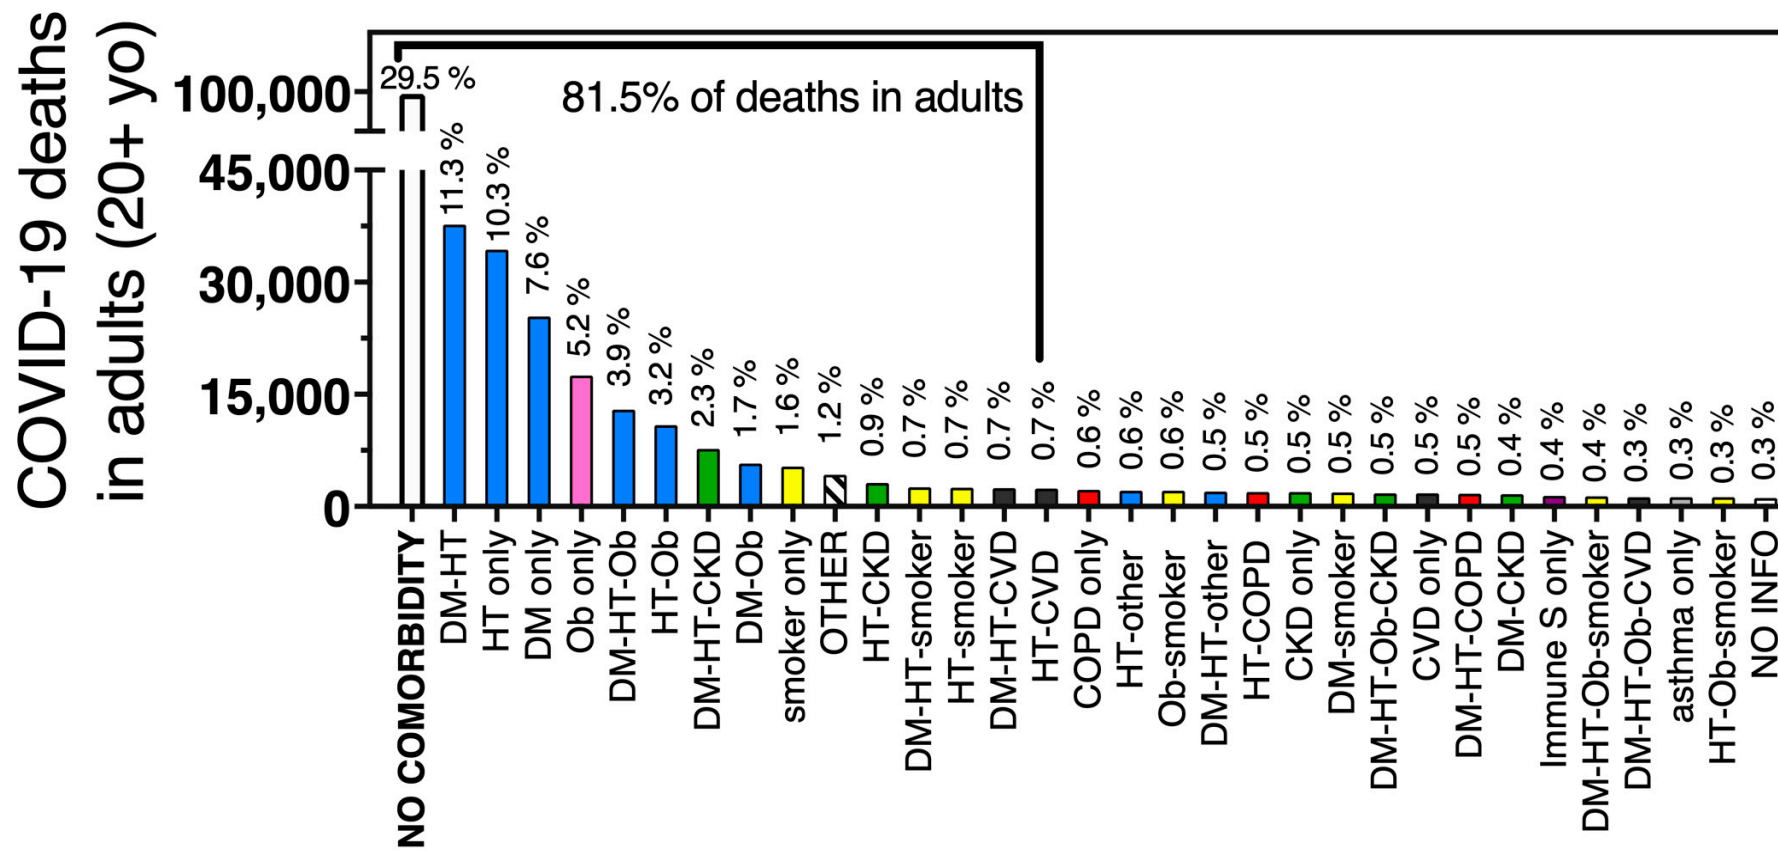

Supplement: s1 [file s1]
